# Supplementary material
Source: PubMed Central journal article supplement (PMC6487215)
Supplement: NIHMS1525484-supplement-2.pdf [file NIHMS1525484-supplement-2.pdf]

Supplemental table 1. Circulating hormonal levels of study patients<sup>a</sup>.

|                                | <b>PCOS (n=1371)</b> | <b>UI (n=878)</b> | <b>p value<sup>b</sup></b> |
|--------------------------------|----------------------|-------------------|----------------------------|
| Total testosterone(ng/dL)      | 53.0 (38.7–71.5)     | 22.4 (15.9–30.3)  | <0.001                     |
| SHBG (nmol/L)                  | 26.2 (18.4–38.5)     | 55.6 (38.5–75.3)  | <0.001                     |
| Calculated free androgen index | 7.1 (4.2–10.9)       | 1.4 (0.9–2.2)     | <0.001                     |
| Fasting insulin (μIU/mL)       | 15.4 (7.8–25.7)      | 5.0 (2.0–10.8)    | <0.001                     |
| Proinsulin (pmol/L)            | 14.9 (9.8–24.1)      | 11.1 (8.1–14.7)   | <0.001                     |
| Fasting glucose (mg/dL)        | 86.9 (79.6–93.8)     | 85.7 (79.1–91.7)  | 0.003                      |
| HOMA-IR                        | 3.3 (1.5–5.6)        | 1.0 (0.4–2.3)     | <0.001                     |

SHBG, sex hormone-binding globulin; HOMA-IR, homeostatic model assessment-insulin resistance;

<sup>a</sup>Data were shown as median (Interquartile range, IQR). HOMA-IR was calculated according to the following formula: (insulin × glucose) ÷ 405.

<sup>b</sup> A Wilcoxon rank sum test was used for testing differences between the two groups.
