# Supplementary material
Source: PubMed Central journal article supplement (PMC6487215)

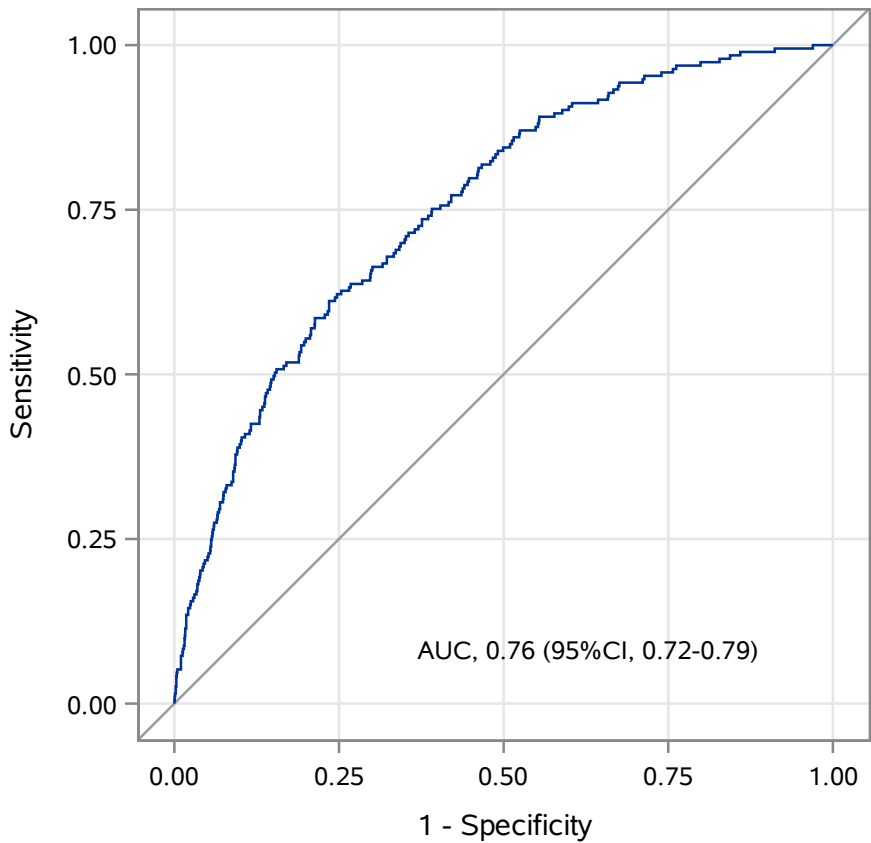

Supplement: NIHMS1525484-supplement-1.pdf [file NIHMS1525484-supplement-1.pdf]
